# Supplementary material
Source: PubMed Central journal article supplement (PMC4649249)
Supplement: AAC.01496-15_zac012154598so1.pdf [file AAC.01496-15_zac012154598so1.pdf]

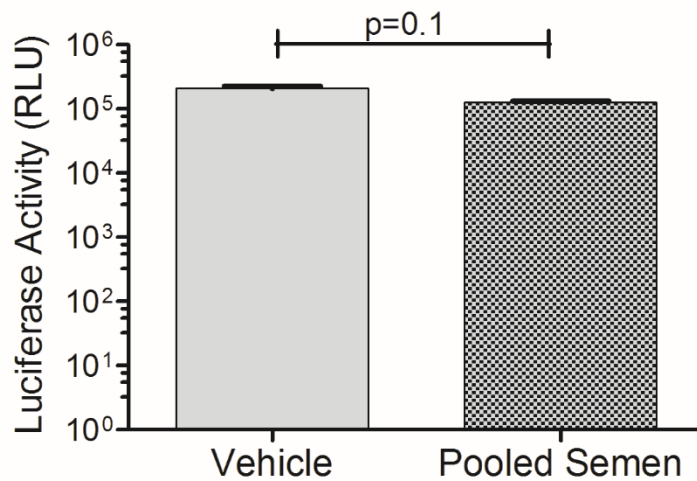

**Figure S1. *In vitro* analysis of HIV-1<sub>JR-CSF</sub> infection in the presence of human semen.** To determine the effect of semen on HIV-1 infection *in vitro*, TZM-bl cells were infected with HIV-1 mixed with an equal amount of human semen or culture medium. Forty-eight hours later, luciferase activity, measured in relative light units (RLU), was used as a surrogate of infection. Statistical analysis was performed using a two-tailed Mann Whitney test.
